# Supplementary material for: Antifungal activity of an artificial peptide aptamer SNP-D4 against Fusarium oxysporum
Source: PeerJ. 2022 Feb 22;10:e12756. doi: 10.7717/peerj.12756 (PMC8877334; doi:10.7717/peerj.12756)
Supplement: Supplemental Information 4 [file peerj-10-12756-s004.xlsx]

## Sheet: Sheet1
Table 2 Spore proteins interacting with the eight proteins targeted by SNP-D4.
Accession Number	Description
A0A5C6T3R4	ubiquinol-cytochrome c reductase core subunit 2
A0A559L2V0	cytochrome c oxidase subunit 5b
A0A5C6TA22	serine/threonine-protein kinase HSL1, negative regulator of Swe1 kinase [EC:2.7.11.-]
A0A559LTF7	glycogen synthase kinase 3 beta [EC:2.7.11.26]
A0A5C6T824	elongation factor 1-alpha
A0A5C6SS36	translation initiation factor 3 subunit I
A0A559LDC4	translation initiation factor 3 subunit G
A0A559L0T4	translation initiation factor 3 subunit F
A0A5C6T9K5	translation initiation factor 3 subunit E
A0A5C6STK9	translation initiation factor 3 subunit C
A0A559LFQ9	translation initiation factor 3 subunit B
A0A5C6TFU3	translation initiation factor 3 subunit A
A0A559LWN4	translation initiation factor 4A
A0A559LBV6	heat shock 70kDa protein 1/2/6/8
A0A559LB45	heat shock 70kDa protein 1/2/6/8
A0A559LAE1	ATP-dependent Clp protease ATP-binding subunit ClpB
A0A559LDX2	molecular chaperone DnaK
A0A559KTL9	prefoldin beta subunit
A0A5C6TFI9	14-3-3 protein epsilon
A0A5C6TE07	DnaJ homolog subfamily B member 4
A0A5C6T5M2	DnaJ homolog subfamily C member 2
A0A5C6TKH1	DNA damage-binding protein 1
A0A559LUN1	nucleosome assembly protein 1-like 1
A0A5C6ST10	SWI/SNF-related matrix-associated actin-dependent regulator of chromatin subfamily A member 5 [EC:3.6.4.-]
A0A5C6TDL4	CCR4-NOT transcription complex subunit 6 [EC:3.1.13.4]
A0A559KUE0	ATP-dependent RNA helicase DDX6/DHH1 [EC:3.6.4.13]
A0A5C6TEN7	5'-3' exoribonuclease 1 [EC:3.1.13.-]
A0A5C6TNF4	116 kDa U5 small nuclear ribonucleoprotein component
A0A5C6ST18	pre-mRNA-processing factor 8
A0A5C6SZ25	nuclear GTP-binding protein
A0A559LSI3	rRNA 2'-O-methyltransferase fibrillarin [EC:2.1.1.-]
A0A559L186	guanine nucleotide-binding protein subunit beta-2-like 1 protein
A0A5C6T2J8	pescadillo
A0A559LC97	ribosome production factor 2
A0A559LTP9	translation initiation factor 3 subunit M
A0A5C6TJB9	transcription elongation factor SPT5
A0A5C6SSZ1	RNA polymerase-associated protein RTF1
A0A5C6SNW1	cytosolic iron-sulfur protein assembly protein CIAO1
A0A5C6TGW2	DnaJ homolog subfamily A member 2
A0A5C6T0A3	Unknown
A0A5C6TNE9	Unknown
A0A559LG70	Unknown
