# Supplementary material for: Antifungal activity of an artificial peptide aptamer SNP-D4 against Fusarium oxysporum
Source: PeerJ. 2022 Feb 22;10:e12756. doi: 10.7717/peerj.12756 (PMC8877334; doi:10.7717/peerj.12756)
Supplement: Supplemental Information 5 — The pepaptemer concentration ranged from 0-8 u. [file peerj-10-12756-s005.xlsx]

## Sheet: Sheet1
spore genmination rate and the pepaptemer concentration ranged from 0-8 u.
PBS	SN(2μM)	SN(4μM)	SN(8μM)	D4(2μM)	D4(4μM)	D4(8μM)
0.74	0.78	0.77	0.71	0.61	0.5	0.35
0.81	0.82	0.76	0.76	0.57	0.45	0.37
0.8	0.77	0.74	0.72	0.76	0.57	0.43
