# Supplementary material for: Antifungal activity of an artificial peptide aptamer SNP-D4 against Fusarium oxysporum
Source: PeerJ. 2022 Feb 22;10:e12756. doi: 10.7717/peerj.12756 (PMC8877334; doi:10.7717/peerj.12756)
Supplement: Supplemental Information 6 [file peerj-10-12756-s006.xlsx]

## Sheet: Sheet1
fungicide rate and the pepaptemer concentration ranged from 0-8 u.
0.3%hymexazol	SN(2μM)	SN(4μM)	SN(8μM)	SN(10μM)	D4(2μM)	D4(4μM)	D4(8μM)	D410μM)
0.848739	0.092437	0.243697	0.151261	0.210084	0.168067	0.235294	0.445378	0.453782
0.869919	0.178862	0.195122	0.219512	0.178862	0.186992	0.349593	0.308943	0.422764
0.876033	0.22314	0.173554	0.22314	0.190083	0.0826446	0.272727	0.338843	0.454545
0.821429	0.107143	0.0267857	0.0714286	0.196429	0.223214	0.205357	0.25	0.3125
